# Supplementary material for: Construction of a tetraphenylethene derivative exhibiting high contrast and multicolored emission switching
Source: Royal Society of Chemistry journal article supplement (doi:10.1039/c7tc04384h), 2017-01-01
Supplement: c7tc04384h1.pdf [file c7tc04384h1.pdf]

*Electronic Supporting information*

**Construction of Tetraphenylethene Derivative Exhibiting High  
Contrast and Multicolored Emission Switching**

Haiyan Tian,<sup>a</sup> Pengpeng Wang,<sup>a</sup> Jing Liu,<sup>a</sup> Yuxin Duan,<sup>a</sup> and Yong Qiang Dong<sup>\*a</sup>

<sup>a</sup>Beijing Key Laboratory of Energy Conversion and Storage Materials, College of  
Chemistry, Beijing Normal University, No. 19, XinJieKouWai Street, Beijing, 100875,  
China, \*E-mail: dongyq@bnu.edu.cn

## Tables of Contents

|                                                                                                                                                                                                                                                                                                                                                                                                                                                                                                                                  |           |
|----------------------------------------------------------------------------------------------------------------------------------------------------------------------------------------------------------------------------------------------------------------------------------------------------------------------------------------------------------------------------------------------------------------------------------------------------------------------------------------------------------------------------------|-----------|
| <b>Experimental Section</b> .....                                                                                                                                                                                                                                                                                                                                                                                                                                                                                                | <b>2</b>  |
| <b>Table S1</b> Summary of crystal data and intensity collection parameters for <b>1CA</b> .....                                                                                                                                                                                                                                                                                                                                                                                                                                 | <b>4</b>  |
| <b>Table S2</b> Summary of crystal data and intensity collection parameters for <b>1CB</b> .....                                                                                                                                                                                                                                                                                                                                                                                                                                 | <b>5</b>  |
| <b>Fig. S1</b> UV-vis absorption of luminogen <b>1</b> in water/acetonitrile mixtures;<br>Concentration: 10 $\mu$ M .....                                                                                                                                                                                                                                                                                                                                                                                                        | <b>6</b>  |
| <b>Table S3</b> Torsion angle of phenyl rings in two single crystals of compound <b>1</b> .....                                                                                                                                                                                                                                                                                                                                                                                                                                  | <b>6</b>  |
| <b>Fig. S2</b> View of C-H $\cdots$ O (green dashed line) and C-H $\cdots$ $\pi$ (red dashed line) between<br>molecules and intramolecular C-H $\cdots$ $\pi$ (dark-red dashed line) interactions in single<br>crystal of <b>1CA</b> . The blue dots refer to the center of benzene rings.....                                                                                                                                                                                                                                   | <b>7</b>  |
| <b>Table S4</b> Summarization of the C-H $\cdots$ O and C-H $\cdots$ $\pi$ interactions in the crystal of<br><b>1CA</b> (intermolecular interactions: 1-5; intramolecular interactions: 6) .....                                                                                                                                                                                                                                                                                                                                 | <b>7</b>  |
| <b>Fig. S3</b> View of C-H $\cdots$ O (green dashed line) interactions between molecules in single<br>crystal of <b>1CB</b> .....                                                                                                                                                                                                                                                                                                                                                                                                | <b>7</b>  |
| <b>Table S5</b> Summarization of the C-H $\cdots$ O interactions in the crystal of <b>1CB</b> .....                                                                                                                                                                                                                                                                                                                                                                                                                              | <b>8</b>  |
| <b>Fig. S4</b> DSC curves of <b>1CA</b> heating at a rate of 10 K/min from 60 $^{\circ}$ C to 85 $^{\circ}$ C; then<br>heat at a rate of 0.5 K/min from 85 $^{\circ}$ C to 120 $^{\circ}$ C. ....                                                                                                                                                                                                                                                                                                                                | <b>8</b>  |
| <b>Table S6</b> Optical Properties of Samples a-g in Fig. 3 .....                                                                                                                                                                                                                                                                                                                                                                                                                                                                | <b>8</b>  |
| <b>Fig. S5</b> (a) Photos of <b>1CA</b> in the three repeating cycles. (b) Normalized PL spectra of<br>samples in the picture of a, (c) DSC curves and (d) powder XRD patterns of <b>1CA</b> in<br>the first cycle. (e) Photos of <b>1CB</b> in the three repeating cycles. (f) Normalized PL<br>spectra of samples in the picture of e, (g) DSC curves and (h) powder XRD patterns<br>of <b>1CB</b> in the first cycle. Excitation wavelength: 350 nm; Photos were taken under<br>365 UV illumination, expose time: 1/25 s..... | <b>9</b>  |
| <b>Fig. S6</b> Spontaneously recovering of <b>1CA</b> at room temperature (30 $^{\circ}$ C) after ground in<br>mortar. Photos are taken under 365 UV illumination at different time; exposed time:<br>1/8 s .....                                                                                                                                                                                                                                                                                                                | <b>10</b> |
| <b>Fig. S7</b> Powder XRD patterns of <b>1</b> in different states; a: <b>1CA</b> ; b: <b>1CB</b> ; c: ground from<br><b>1CA</b> ; d: ground from <b>1CB</b> . .....                                                                                                                                                                                                                                                                                                                                                             | <b>10</b> |
| <b>Fig. S8</b> Spontaneously recovering of ground amorphous solid of <b>1CA</b> at room<br>temperature (30 $^{\circ}$ C) after ground in mortar. Photos are taken under 365 UV<br>illumination at different time; exposed time: 1/8 s .....                                                                                                                                                                                                                                                                                      | <b>10</b> |
| <b>Fig. S9</b> The $^1$ H NMR spectrum of <b>1</b> in DMSO- $d_6$ solution .....                                                                                                                                                                                                                                                                                                                                                                                                                                                 | <b>11</b> |
| <b>Fig. S10</b> The $^{13}$ C NMR spectrum of <b>1</b> in DMSO- $d_6$ solution .....                                                                                                                                                                                                                                                                                                                                                                                                                                             | <b>11</b> |
| <b>Fig. S11</b> The HRMS spectrum of compound <b>1</b> .....                                                                                                                                                                                                                                                                                                                                                                                                                                                                     | <b>12</b> |

## Experimental Section

### Materials and Instrumentations

4,4'-dihydroxybenzophenone was purchased from Alfa Aesar. Potassium carbonate, titanium tetrachloride, acetone, zinc dust, 1-bromobutane, acetone, 1-bromobutane, ammonium chloride, and anhydrous magnesium sulfate were purchased from Sinopharm Chemical Reagent Co.Ltd. THF was purchased from Aldrich and distilled under normal pressure from sodium benzophenone under argon immediately prior to use.

All the reactions were carried out under a nitrogen atmosphere using Schlenk technique.  $^1\text{H}$ NMR and  $^{13}\text{C}$ NMR spectra were recorded using a Bruker AV 400 Spectrometer at 400 and 100 MHz in DMSO- $d_6$  solutions, respectively. Tetramethylsilane was used as the internal standard. An LCT Premier XE time-of-flight mass spectrometer (Micromass), equipped with a dual sprayer orthogonal electrospray source (LockSpray), was used to obtain exact mass measurements. Fluorescence spectra of all samples were measured by a Cary Eclipse spectrofluorometer. Fluorescence quantum yields of solid were recorded on Hamamatsu Quantaurus-QY C9220-02 at room temperature with a calibrated integrating sphere system, and the machine was revaluated using standard sample before measurement. Fluorescence lifetimes were measured with Hamamatsu Quantaurus-Tau C11367-11 at room temperature. Infra-red (IR) spectra were obtained on a Nicolet Fourier spectrofluorometer. Differential scanning calorimetry (DSC) was carried out using a Mettler DSC 1 instrument at a scanning rate of 10 K  $\text{min}^{-1}$ . Powder X-Ray diffraction (PXRD) patterns were performed on an X'Pert PRO MPD diffractometer with Cu  $K\alpha$  radiation ( $\lambda = 1.5418 \text{ \AA}$ ) at 25°C (scan range: 4.5-50°). Single crystals data was collected on a Bruker Smart APEXII CCD diffractometer using graphite monochromatic Mo  $K\alpha$  radiation ( $\lambda=0.71070 \text{ \AA}$ ). Melting points were measured by DSC analysis. All photographs were recorded on a FinePix S7000 digital camera. The thermal annealing processes were carried out in oven. The amorphous solid of luminogens were prepared by heating the luminogens to melt with a heating gun and quenching the melt with liquid nitrogen.

## Synthesis Procedures and Characterization Data

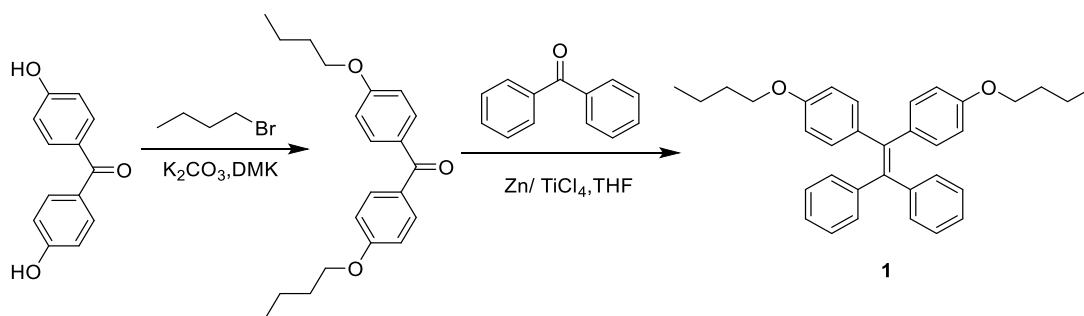

Synthesis routes of luminogen **1**.

A mixture of 4, 4'-dihydroxybenzophenone 6.52 g (30 mmol), 1-bromobutane 60 mL, potassium carbonate 12.44 g (90 mmol) and 60 mL of acetone were added into 500 mL two-neck flask. The mixture was refluxed under nitrogen atmosphere until TLC exhibited complete conversion. The cooled mixture was poured into 300 mL of water and extracted with diethyl ether (3×100 mL). The organic layers were dried over anhydrous magnesium sulfate and filtered. The solvent of filtrate was removed with a rotary evaporator to gain dibutoxy benzophenone as white powder (26.1 mmol, 87%).

As a universal McMurry coupling reaction, a 250 mL two-necked flask equipped with a magnetic stirrer was charged with zinc powder (3.09 g, 48 mmol) and 60 mL THF under nitrogen atmosphere. The mixture was cooled to 0°C, and TiCl<sub>4</sub> (2.55 mL, 24 mmol) was added slowly by a injector. The mixture was refluxed for 2.5 h and cooled to room temperature. Then pyridine (1.33 mL) was added dropwise. Then dibutoxy benzophenone (4.95 g, 10 mmol) in THF (100 mL) was added to the mixture. Then the mixture was refluxed until TLC showing complete conversion. The reaction was quenched with saturated aqueous NH<sub>4</sub>Cl solution, and extracted with diethyl ether. The organic layer was desiccated with anhydrous magnesium sulfate for two hours, and then filtered. The solvent were removed by evaporation. Finally the resulting residue was purified by column chromatography (1.90 g, 40%).

**1**: M.p.89.9°C-92.0°C. <sup>1</sup>HNMR (400 MHz, DMSO-d<sub>6</sub>) δ: 0.91(t,6H,CH<sub>3</sub>), 1.41(m, 4H,CH<sub>2</sub>), 1.62(m,4H,CH<sub>2</sub>), 3.86(t,4H,OCH<sub>2</sub>), 6.66(d,4H,Ar-H), 6.83(d,4H,Ar-H), 6.94(d,4H,Ar-H), 7.09(m,6H,Ar-H); <sup>13</sup>CNMR (100 MHz, DMSO-d<sub>6</sub>) δ: 13.62, 18.66, 66.93, 113.58, 126.10, 127.73, 130.63, 131.90, 138.63, 139.88, 143.79, 157.16; HRMS (ESI): *m/z* calcd. 477.2715 for C<sub>34</sub>H<sub>36</sub>O<sub>2</sub>, found 477.2791; Elemental analysis: calcd. for C<sub>34</sub>H<sub>36</sub>O<sub>2</sub> (%): C, 85.71, H, 7.56; found (%) C, 85.46, H, 7.92.

**Table S1** Summary of crystal data and intensity collection parameters for **1CA**.

| <b>Sample</b>                     | <b>1CA</b>                                     |                 |
|-----------------------------------|------------------------------------------------|-----------------|
| Empirical formula                 | C <sub>34</sub> H <sub>36</sub> O <sub>2</sub> |                 |
| Formula weight                    | 476.27                                         |                 |
| Temperature                       | 110(2) K                                       |                 |
| Wavelength,                       | 0.71073 Å                                      |                 |
| Crystal system                    | Orthorhombic                                   |                 |
| Space group                       | Ibca                                           |                 |
| Unit cell dimensions              | a = 16.6206(18) Å                              | alpha = 90 deg. |
|                                   | b = 17.1087(18) Å                              | beta = 90 deg.  |
|                                   | c = 18.788(2) Å                                | gamma = 90 deg. |
| Volume                            | 5342.5(10) Å <sup>3</sup>                      |                 |
| Z, Calculated density             | 8, 1.185 Mg/m <sup>3</sup>                     |                 |
| Absorption coefficient            | 0.072 mm <sup>-1</sup>                         |                 |
| F(000)                            | 2048                                           |                 |
| Crystal size                      | 0.48 x 0.33 x 0.11 mm                          |                 |
| Theta range for data collection   | 2.17 to 27.59 deg.                             |                 |
| Limiting indices                  | -21<=h<=19, -21<=k<=21, -20<=l<=24             |                 |
| Reflections collected / unique    | 15015 / 3092 [R(int) = 0.0422]                 |                 |
| Completeness to theta = 27.59     | 99.6 %                                         |                 |
| Absorption correction             | Semi-empirical from equivalents                |                 |
| Max. and min. transmission        | 0.9922 and 0.9664                              |                 |
| Refinement method                 | Full-matrix least-squares on F <sup>2</sup>    |                 |
| Data / restraints / parameters    | 3092 / 0 / 165                                 |                 |
| Goodness-of-fit on F <sup>2</sup> | 1.038                                          |                 |
| Final R indices [I > 2sigma(I)]   | R1 = 0.0392, wR2 = 0.0840                      |                 |
| R indices (all data)              | R1 = 0.0597, wR2 = 0.0925                      |                 |
| Largest diff. peak and hole       | 0.251 and -0.192 e.Å <sup>-3</sup>             |                 |

**Table S2** Summary of crystal data and intensity collection parameters for **1CB**.

| <b>Sample</b>                     | <b>1CB</b>                                                                                                              |
|-----------------------------------|-------------------------------------------------------------------------------------------------------------------------|
| Empirical formula                 | C <sub>34</sub> H <sub>36</sub> O <sub>2</sub>                                                                          |
| Formula weight                    | 476.27                                                                                                                  |
| Temperature                       | 180(2) K                                                                                                                |
| Wavelength                        | 0.71073 Å                                                                                                               |
| Crystal system                    | Monoclinic                                                                                                              |
| Space group                       | P2(1)/c                                                                                                                 |
| Unit cell dimensions              | a = 13.6584(13) Å    alpha = 90 deg.<br>b = 5.7107(6) Å    beta = 100.414(2) deg.<br>c = 36.606(4) Å    gamma = 90 deg. |
| Volume                            | 13.6584(13) Å <sup>3</sup>                                                                                              |
| Z, Calculated density             | 4, 1.127 Mg/m <sup>3</sup>                                                                                              |
| Absorption coefficient            | 0.068 mm <sup>-1</sup>                                                                                                  |
| F(000)                            | 1024                                                                                                                    |
| Crystal size                      | 0.18 x 0.16 x 0.10 mm                                                                                                   |
| Theta range for data collection   | 2.26 to 25.25 deg.                                                                                                      |
| Limiting indices                  | -16<=h<=12, -5<=k<=6, -42<=l<=43                                                                                        |
| Reflections collected / unique    | 13347 / 5072 [R(int) = 0.0309]                                                                                          |
| Completeness to theta = 25.25     | 99.9 %                                                                                                                  |
| Absorption correction             | Semi-empirical from equivalents                                                                                         |
| Max. and min. transmission        | 0.9932 and 0.9878                                                                                                       |
| Refinement method                 | Full-matrix least-squares on F <sup>2</sup>                                                                             |
| Data / restraints / parameters    | 5072 / 190 / 379                                                                                                        |
| Goodness-of-fit on F <sup>2</sup> | 1.026                                                                                                                   |
| Final R indices [I > 2sigma(I)]   | R1 = 0.0552, wR2 = 0.1384                                                                                               |
| R indices (all data)              | R1 = 0.0841, wR2 = 0.1596                                                                                               |
| Largest diff. peak and hole       | 0.374 and -0.305 e.Å <sup>-3</sup>                                                                                      |

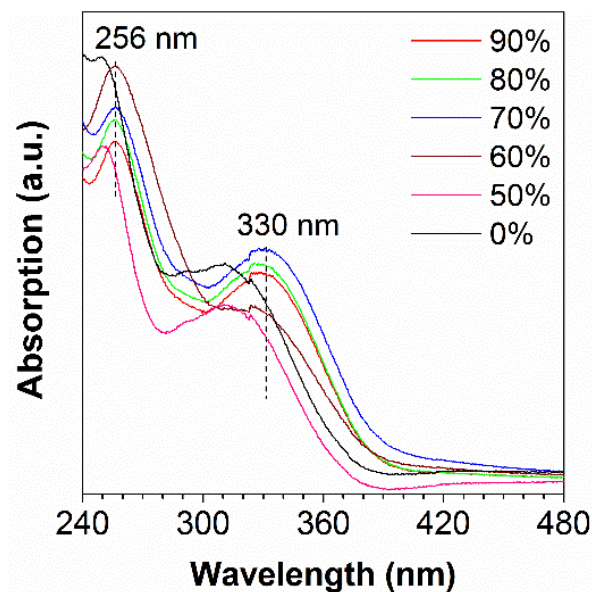

**Fig. S1** UV-vis absorption of luminogen **1** in water/acetonitrile mixtures; Concentration: 10  $\mu\text{M}$ .

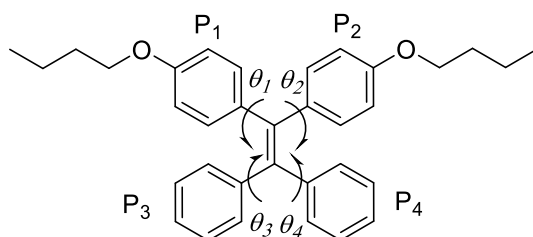

**Table S3** Torsion angle of phenyl rings in two single crystals of compound **1**.

| Samples    | $\lambda_{\text{em}}$ | $\theta_1$ | $\theta_2$ | $\theta_3$ | $\theta_4$ | $\theta_A$ |
|------------|-----------------------|------------|------------|------------|------------|------------|
| <b>1CA</b> | 420 nm                | 48.22      | 49.51      | 53.27      | 52.72      | 50.93      |
| <b>1CB</b> | 460 nm                | 50.98      | 51.16      | 53.28      | 51.62      | 51.76      |

$\theta_1$ , dihedral angle between benzene ring P<sub>1</sub> and double bond plane.  $\theta_2$ , dihedral angle between benzene ring P<sub>2</sub> and double bond plane.  $\theta_3$ , dihedral angle between benzene ring P<sub>3</sub> and double bond plane.  $\theta_4$ , dihedral angle between benzene ring P<sub>4</sub> and double bond plane.  $\theta_A$ , average value of  $\theta_1$ ,  $\theta_2$ ,  $\theta_3$ , and  $\theta_4$ .

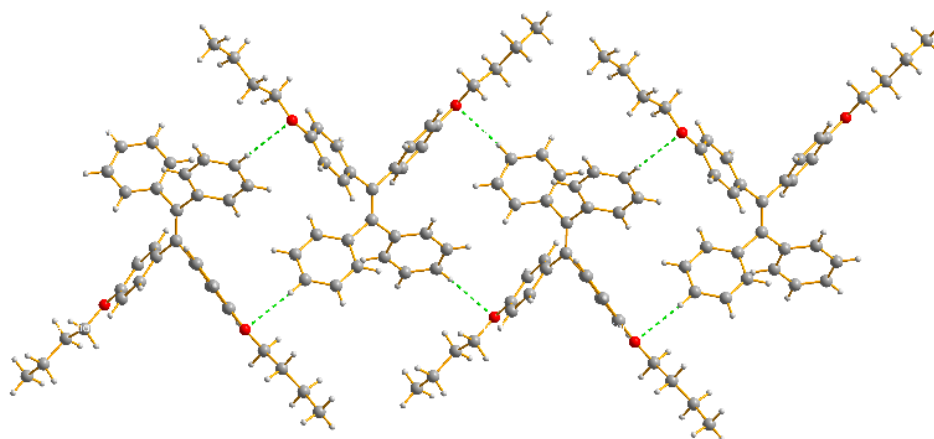

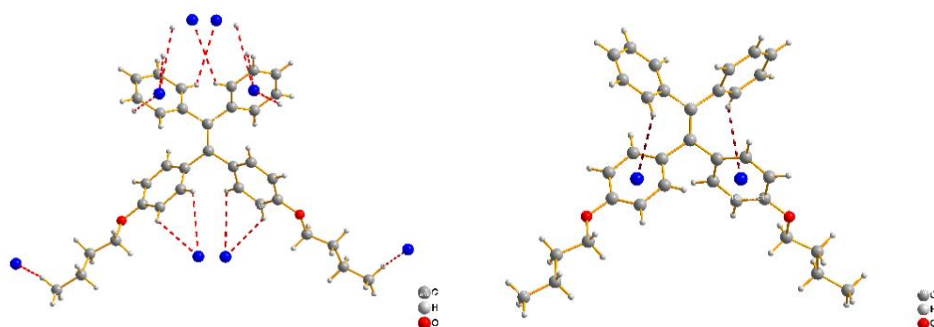

**Fig. S2** View of C-H...O (green dashed line) and C-H... $\pi$  (red dashed line) between molecules and intramolecular C-H... $\pi$  (dark-red dashed line) interactions in single crystal of **1CA**. The blue dots refer to the center of benzene rings.

**Table S4** Summarization of the C-H...O and C-H... $\pi$  interactions in the crystal of **1CA** (intermolecular interactions: 1-5; intramolecular interactions: 6).

| Interactions  | d /Å [a] <sup>[N]</sup> [b] | A/° [c]     |
|---------------|-----------------------------|-------------|
| 1C-H...O      | 2.560(4)                    | 151.484(84) |
| 2C-H... $\pi$ | 2.978(4)                    | 128.764(70) |
| 3C-H... $\pi$ | 3.435(4)                    | 112.285(70) |
| 4C-H... $\pi$ | 3.447(4)                    | 119.569(75) |
| 5C-H... $\pi$ | 3.474(2)                    | 121.787(75) |
| 6C-H... $\pi$ | 3.442(2)                    | 106.499(71) |

[a] Distance of C-H... $\pi$  or C-H...O interaction. [b] Number of the intermolecular or intramolecular interactions. [c] Angel of C-H... $\pi$  or C-H...O interaction.

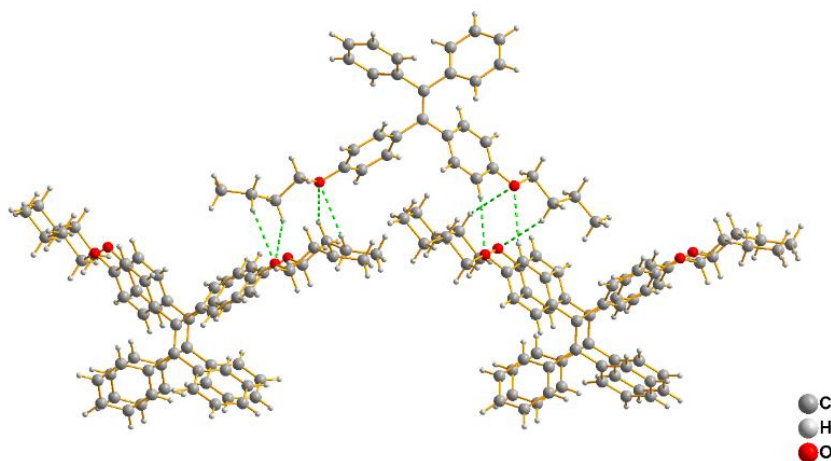

**Fig. S3** View of C-H...O (green dashed line) interactions between molecules in single crystal of **1CB**.



**Table S5** Summarization of the C-H...O interactions in the crystal of **1CB**.

| Interactions | $d / \text{\AA}$ [a](N) <sup>[b]</sup> | $A/^\circ$ [c] |
|--------------|----------------------------------------|----------------|
| 1C-H...O     | 2.595(2)                               | 138.684(587)   |
| 2C-H...O     | 2.711(2)                               | 135.638(553)   |
| 3C-H...O     | 2.814(2)                               | 169.032(174)   |
| 4C-H...O     | 2.939(2)                               | 150.676(236)   |

[a] Distance of C-H...O interaction. [b] Number of the intermolecular interactions. [c] Angel of C-H...O interaction.

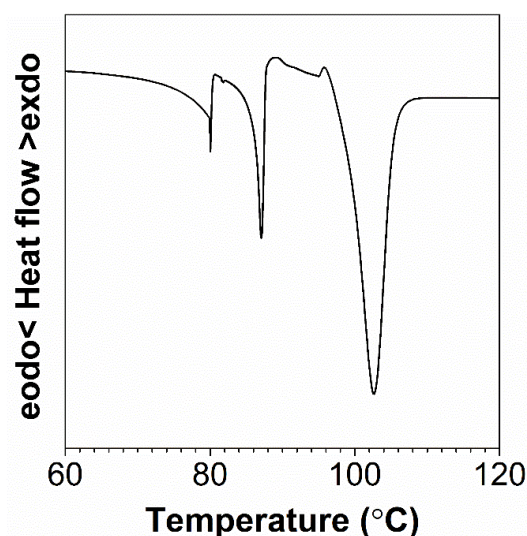**Fig. S4** DSC curves of **1CA** heating at a rate of 10 K/min from 60°C to 85°C; then heat at a rate of 0.5 K/min from 85°C to 120°C.**Table S6** Optical Properties of Samples a-g in Fig. 3

| Samples | <sup>a</sup> $\Phi_F$<br>(%) | $A_1/A_2$ <sup>b</sup> | $\tau_1$ (ns) | $\tau_2$ (ns) | $\langle \tau \rangle$ <sup>c</sup> (ns) |
|---------|------------------------------|------------------------|---------------|---------------|------------------------------------------|
| a       | 7.6                          | 96/4                   | 0.4           | 2.65          | 0.49                                     |
| b       | 5.1                          | 88/12                  | 0.53          | 3.22          | 0.85                                     |
| c       | 42.1                         | 17/83                  | 1.12          | 2.06          | 1.90                                     |
| d       | 48.3                         | 47/53                  | 1.41          | 2.24          | 1.85                                     |
| e       | 6.4                          | 88/12                  | 0.48          | 2.50          | 0.72                                     |
| f       | 8.3                          | 75/25                  | 0.43          | 2.39          | 0.92                                     |
| g       | 50.4                         | 100/0                  | 2.27          |               | 2.27                                     |

<sup>a</sup> $\Phi_F$  = Fluorescence quantum yield determined using a calibrated integrating sphere, excited at 350 nm. <sup>b</sup>Fraction ( $A$ , %) and lifetime ( $\tau$ , ns) of shorter (1) or longer-lived species (2). <sup>c</sup>The mean lifetime  $\langle \tau \rangle$  was calculated according to  $\langle \tau \rangle = (A_1\tau_1 + A_2\tau_2)/(A_1 + A_2)$

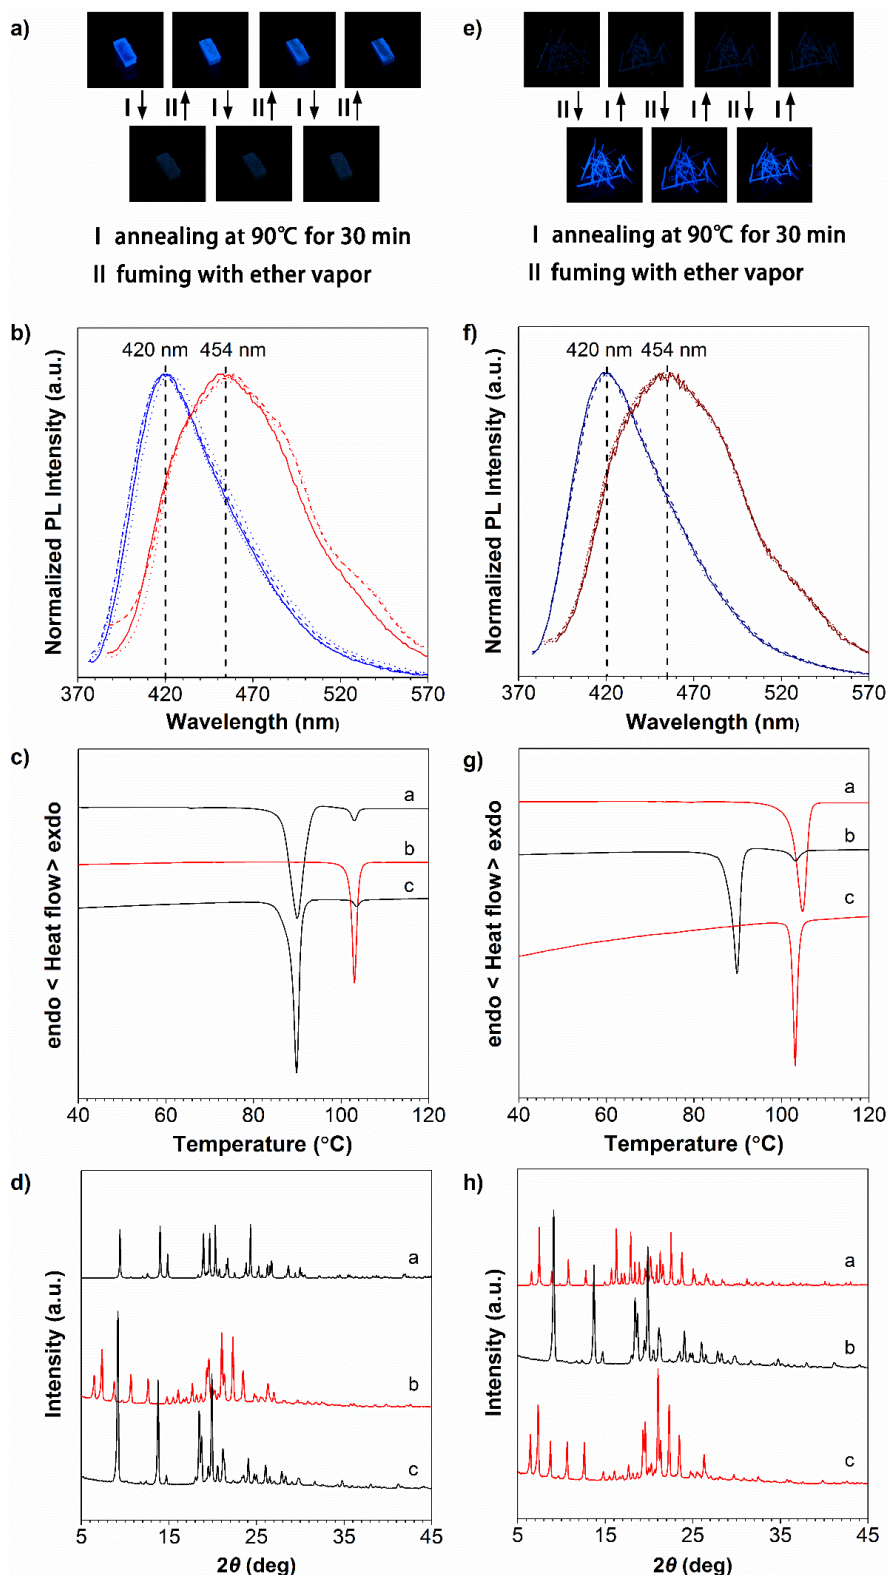

**Fig. S5** (a) Photos of **1CA** in the three repeating cycles. (b) Normalized PL spectra of samples in the picture of a, (c) DSC curves and (d) powder XRD patterns of **1CA** in the first cycle. (e) Photos of **1CB** in the three repeating cycles. (f) Normalized PL spectra of samples in the picture of e, (g) DSC curves and (h) powder XRD patterns of **1CB** in the first cycle. Excitation wavelength: 350 nm; Photos were taken under 365 UV illumination, expose time: 1/25 s.

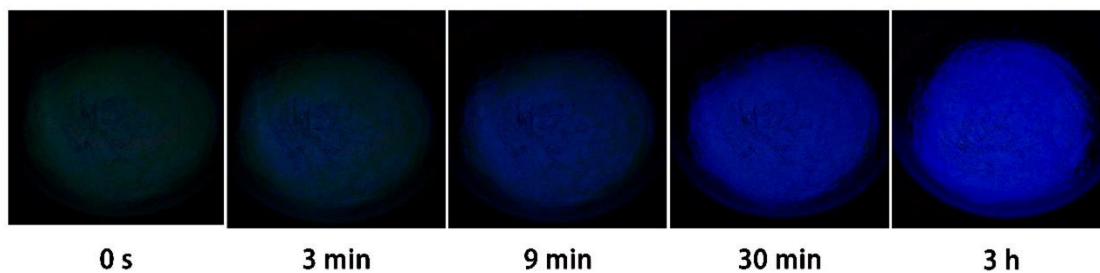

**Fig. S6** Spontaneously recovering of **1CA** at room temperature (30°C) after ground in mortar. Photos are taken under 365 UV illumination at different time; exposed time: 1/8 s.

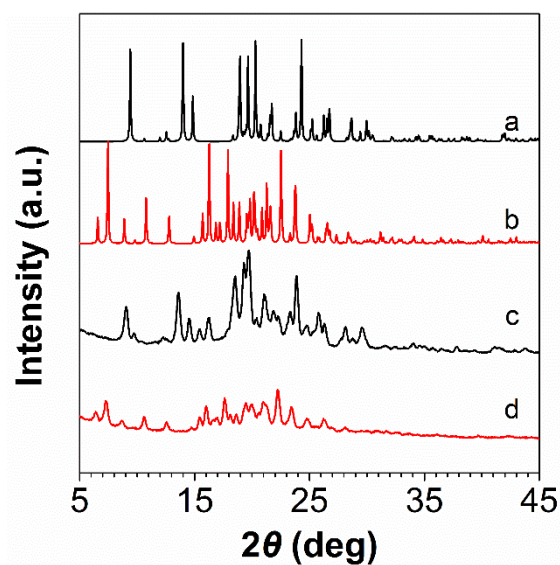

**Fig. S7** Powder XRD patterns of **1** in different states; a: **1CA**; b: **1CB**; c: ground from **1CA**; d: ground from **1CB**.

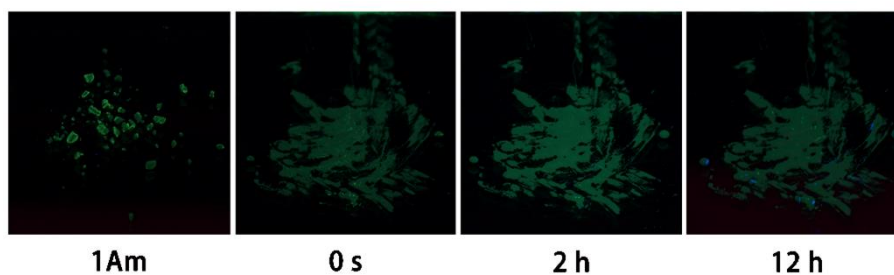

**Fig. S8** Spontaneously recovering of ground amorphous solid of **1** at room temperature (30°C) after ground in mortar. Photos are taken under 365 UV illumination at different time; exposed time: 1/8 s.

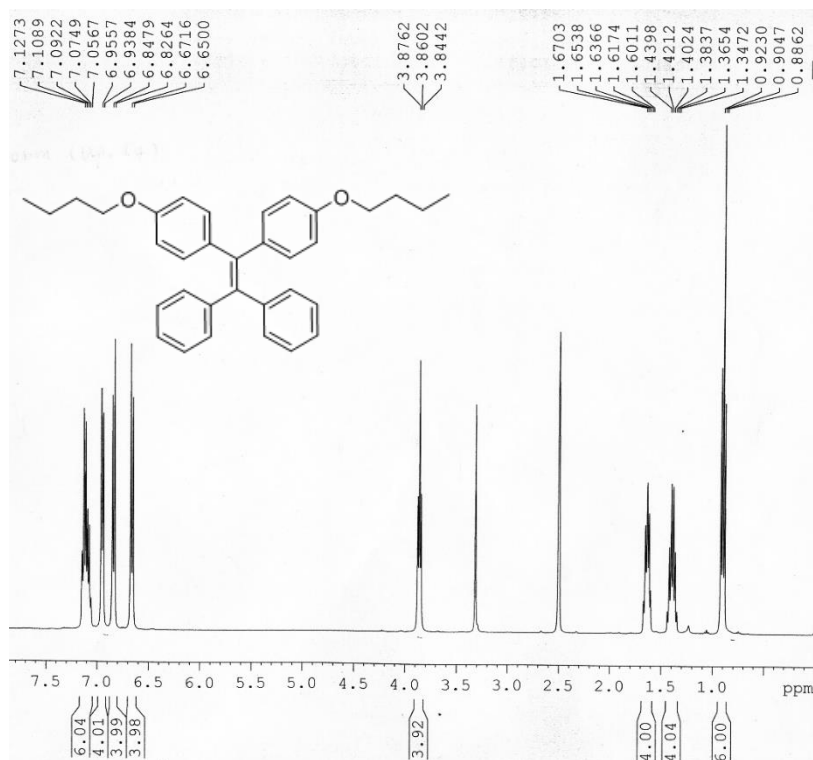

**Fig. S9** The <sup>1</sup>H NMR spectrum of **1** in DMSO-d<sub>6</sub> solution.

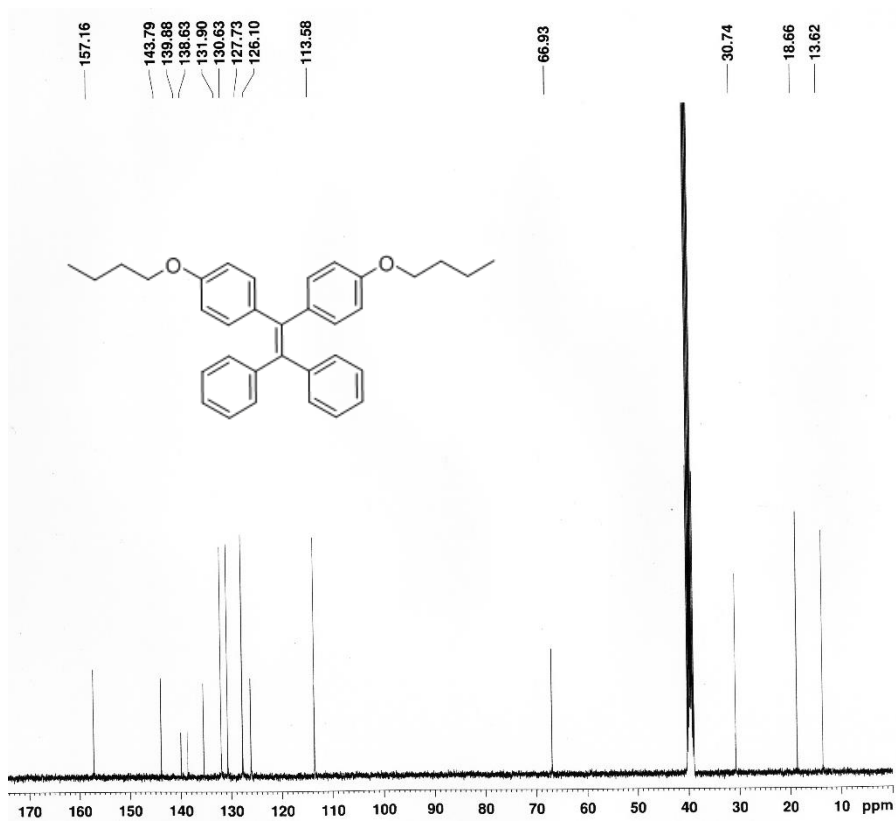

**Fig. S10** The <sup>13</sup>C NMR spectrum of **1** in DMSO-d<sub>6</sub> solution.

## Mass Spectrum SmartFormula Report

| Analysis Info |                                     | Acquisition Date  | 2/27/2017 12:00:27 PM |       |
|---------------|-------------------------------------|-------------------|-----------------------|-------|
| Analysis Name | D:\Data\20170227\THY-C4_13_01_988.d | Operator          | Bruker                |       |
| Method        | lhl-tune_general-p.m                | Instrument / Ser# | micrOTOF-Q            | 10260 |
| Sample Name   | THY-C4                              |                   |                       |       |
| Comment       |                                     |                   |                       |       |

| Acquisition Parameter |          |                       |           |                  |           |
|-----------------------|----------|-----------------------|-----------|------------------|-----------|
| Source Type           | ESI      | Ion Polarity          | Positive  | Set Nebulizer    | 0.4 Bar   |
| Focus                 | Active   | Set Capillary         | 3500 V    | Set Dry Heater   | 180 °C    |
| Scan Begin            | 50 m/z   | Set End Plate Offset  | -500 V    | Set Dry Gas      | 4.0 l/min |
| Scan End              | 1000 m/z | Set Collision Cell RF | 150.0 Vpp | Set Divert Valve | Source    |

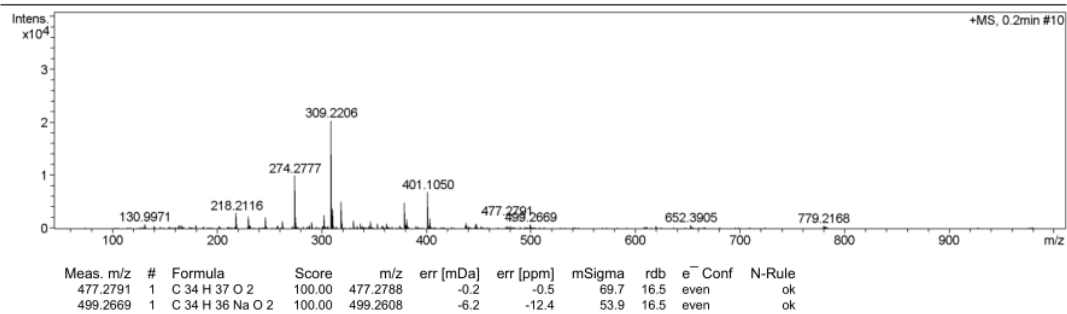

**Fig. S11** The HRMS spectrum of compound **1**.
